# Supplementary material
Source: PubMed Central journal article supplement (PMC4520316)

## FEMALES ON PND1

A

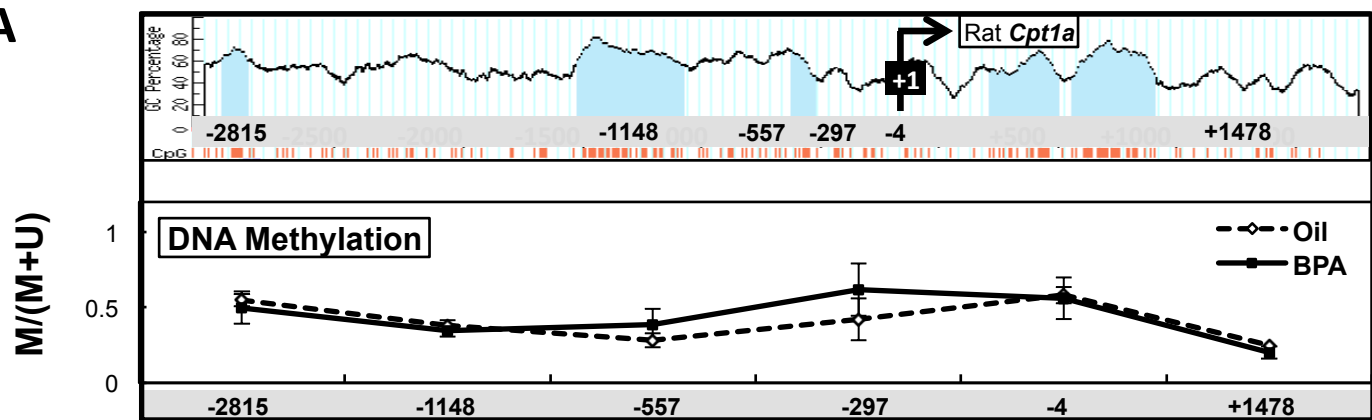

B

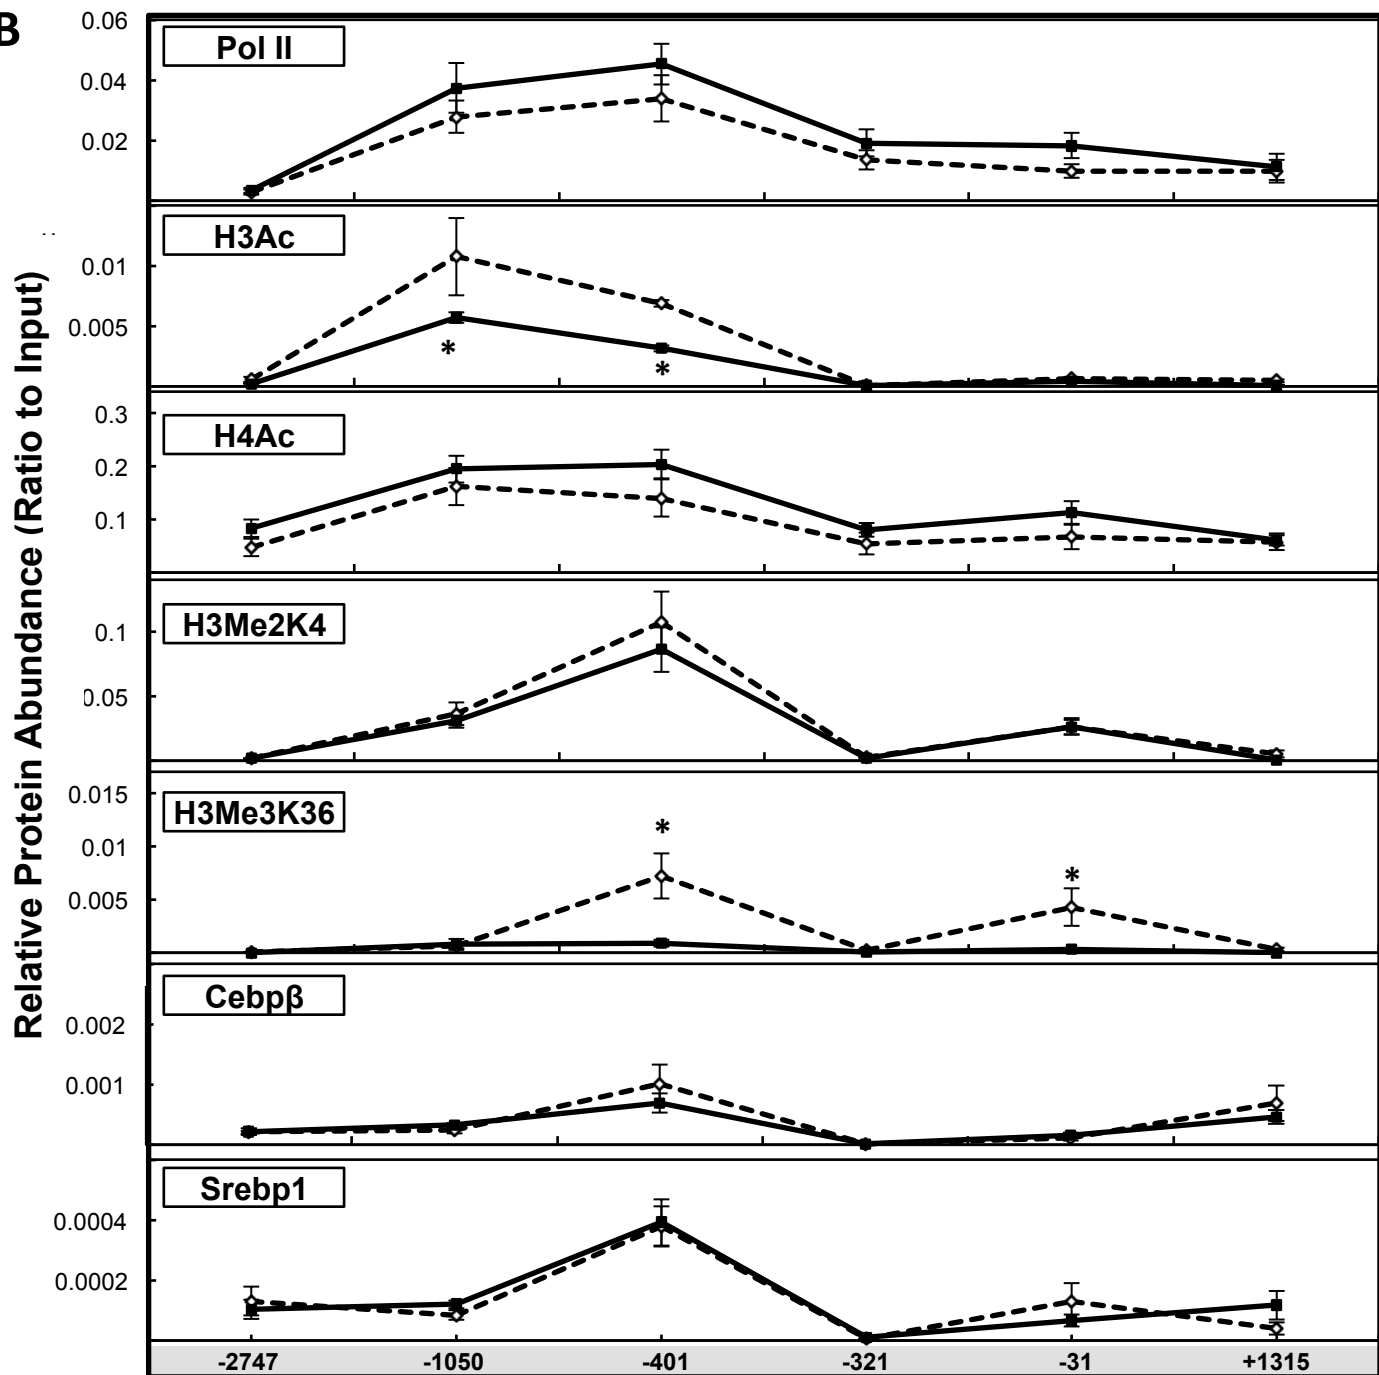

Supplement: NIHMS672427-supplement-2.pdf [file NIHMS672427-supplement-2.pdf]
